# Supplementary material
Source: publisher site journal article supplement (https://www.spandidos-publications.com/5295/downloadSupplementary)
Supplement: Supplementary file 1 [file downloadSupplementary]

Table SI. Clinicopathological characteristics of study patients with AR and NALR before matching.

| Variable             | AR (n=21) | NALR (n=67) | P-value |
|----------------------|-----------|-------------|---------|
| Sex                  |           |             |         |
| Male (%)             | 13 (61.9) | 42 (62.7)   | 0.95    |
| Age                  |           |             |         |
| ≥65 years (%)        | 10 (47.6) | 34 (50.8)   | 0.80    |
| Tumor location       |           |             |         |
| Rectum (%)           | 8 (38.1)  | 41 (61.2)   | 0.06    |
| Pre-operative CEA    |           |             |         |
| ≥5 ng/ml (%)         | 11 (52.4) | 44 (65.7)   | 0.27    |
| Pre-operative CA19-9 |           |             |         |
| ≥37 ng/ml (%)        | 3 (14.3)  | 33 (49.3)   | 0.005   |
| T stage              |           |             |         |
| T3-4 (%)             | 20 (95.2) | 61 (91.0)   | 0.54    |
| N stage              |           |             |         |
| N1-2 (%)             | 15 (71.4) | 44 (65.7)   | 0.62    |
| Tumor diameter       |           |             |         |
| ≥50 mm (%)           | 11 (52.4) | 34 (50.8)   | 0.89    |
| Histological type    |           |             |         |
| Tub (%)              | 20 (95.2) | 62 (92.5)   | 0.67    |
| Lymphatic invasion   |           |             |         |
| Positive (%)         | 10 (47.6) | 25 (37.3)   | 0.40    |
| Venous invasion      |           |             |         |
| Positive (%)         | 16 (76.2) | 59 (88.1)   | 0.18    |
| Pathological stage   |           |             |         |
| I-II                 | 6         | 22          | 0.68    |
| III                  | 11        | 28          |         |
| IV                   | 4         | 17          |         |

All patients with missing data were excluded. AR, anastomotic recurrence; NALR, non-anastomotic recurrence; CEA, carcinoembryonic antigen; CA, carbohydrate antigen; Tub, tubular adenocarcinoma.

Table SII. Information on recurrent tumors for patients with NALR.

| No. | <i>KRAS G13D</i> | <i>RAS</i> status | Age,<br>years | Sex | Tumor location |
|-----|------------------|-------------------|---------------|-----|----------------|
| 1   | +                | G13D              | 72            | F   | Sigmoid        |
| 2   | -                | G12D              | 59            | M   | Sigmoid        |
| 3   | -                | G12D              | 68            | M   | Sigmoid        |
| 4   | -                | G12D              | 58            | M   | Rectum         |
| 5   | -                | G12V              | 71            | F   | Sigmoid        |
| 6   | -                | G12V              | 62            | M   | Sigmoid        |
| 7   | -                | G12A              | 66            | F   | Sigmoid        |
| 8   | -                | WT                | 48            | M   | Rectum         |
| 9   | -                | WT                | 52            | F   | Sigmoid        |
| 10  | -                | WT                | 64            | M   | Rectum         |
| 11  | -                | WT                | 66            | F   | Sigmoid        |
| 12  | -                | Not tested        | 66            | F   | Rectum         |
| 13  | -                | Not tested        | 62            | M   | Sigmoid        |
| 14  | -                | Not tested        | 70            | M   | Rectum         |
| 15  | -                | Not tested        | 71            | M   | Sigmoid        |
| 16  | -                | Not tested        | 56            | M   | Rectum         |

|    |   |            |    |   |            |
|----|---|------------|----|---|------------|
| 17 | - | Not tested | 76 | M | Sigmoid    |
| 18 | - | Not tested | 47 | F | Rectum     |
| 19 | - | Not tested | 61 | F | Rectum     |
| 20 | - | Not tested | 64 | M | Sigmoid    |
| 21 | - | Not tested | 83 | M | Transverse |

NALR, non-anastomotic local recurrence; G13D, *KRAS G13D* mutant; G12D, *KRAS G12D* mutant; WT, *KRAS* wild-type; F, female; M, male.
